# Supplementary material for: Perspectives of physicians and nurses on palliative and end-of-life care practices in ICU beyond the COVID-19 era: An European survey study
Source: Research Square preprint supplement (doi:10.21203/rs.3.rs-6804967/v1), 2025-06-25
Supplement: Supplementary file 1 [file 72e28a27a9343abd803a274d.pdf]

|                                                                                                                                      |                                                      |       |
|--------------------------------------------------------------------------------------------------------------------------------------|------------------------------------------------------|-------|
| Protocol identifier: PC-19-EU<br>ClinicalTrials.gov: <a href="https://clinicaltrials.gov/ct2/show/study/NCT05089032">NCT05089032</a> | Synopsis version last update:<br>1.3 16th March 2023 | FINAL |
|--------------------------------------------------------------------------------------------------------------------------------------|------------------------------------------------------|-------|

## PEOpLE-C19-EU - Electronic survey: questionnaire

### QUESTION GROUPS:

1. CHARACTERISTICS OF THE PARTICIPANT AND THE HOSPITAL
2. EXPERIENCE OF PALLIATIVE CARE BEFORE AND DURING THE COVID-19 PANDEMIC
3. DESCRIPTION OF PALLIATIVE AND END-OF-LIFE CARE AFTER THE PANDEMIC
4. TO EXPLORE THE EXPERIENCES AND POSSIBLE FACTORS LEADING TO MORAL DISTRESS

| GROUP                                                  | No. | QUESTIONS                                 | POSSIBLE ANSWERS                                                                                                                                    |
|--------------------------------------------------------|-----|-------------------------------------------|-----------------------------------------------------------------------------------------------------------------------------------------------------|
| I. CHARACTERISTICS OF THE PARTICIPANT AND THE HOSPITAL | 1.  | What is your profession?                  | a) Nurse<br>b) Physician<br>c) Physiotherapist<br>d) Dietician<br>e) Psychologist<br>f) Other.... (please specify)                                  |
|                                                        | 2.  | What gender do you identify as?           | a) Male<br>b) Female<br>c) Other<br>d) Prefer not to say                                                                                            |
|                                                        | 3.  | What is your age?                         | ... years                                                                                                                                           |
|                                                        | 4.  | In which country do you work?             | Drop-down list                                                                                                                                      |
|                                                        | 5.  | What type of hospital are you working in? | a) Primary (regional, remote)<br>b) Secondary (community, urban)<br>c) Tertiary (university or teaching hospital)<br>d) Other .... (please specify) |

|                                                                                                                                      |                                                      |       |
|--------------------------------------------------------------------------------------------------------------------------------------|------------------------------------------------------|-------|
| Protocol identifier: PC-19-EU<br>ClinicalTrials.gov: <a href="https://clinicaltrials.gov/ct2/show/study/NCT05089032">NCT05089032</a> | Synopsis version last update:<br>1.3 16th March 2023 | FINAL |
|--------------------------------------------------------------------------------------------------------------------------------------|------------------------------------------------------|-------|

|                                                                                  |            |                                                                                                                                    |                                                                                                                                                                                                                                                                                                                                                                                                                                   |
|----------------------------------------------------------------------------------|------------|------------------------------------------------------------------------------------------------------------------------------------|-----------------------------------------------------------------------------------------------------------------------------------------------------------------------------------------------------------------------------------------------------------------------------------------------------------------------------------------------------------------------------------------------------------------------------------|
|                                                                                  | <b>6.</b>  | <b>What type of intensive care unit (ICU) do you work in?</b>                                                                      | a) Medical<br>b) Surgical<br>c) Mixed<br>d) Other .... (please specify)                                                                                                                                                                                                                                                                                                                                                           |
|                                                                                  | <b>7.</b>  | <b>Have you taken direct care of COVID-19 patients in ICU during pandemic? (January 2020 until January 2022)</b>                   | a) Yes<br>b) No                                                                                                                                                                                                                                                                                                                                                                                                                   |
|                                                                                  | <b>8.</b>  | <b>How many years have you practiced critical care medicine/nursing?</b>                                                           | .... Years                                                                                                                                                                                                                                                                                                                                                                                                                        |
|                                                                                  | <b>9.</b>  | <b>Have you finished your speciality training?</b>                                                                                 | Yes<br>No                                                                                                                                                                                                                                                                                                                                                                                                                         |
| <b>II. EXPERIENCE OF PALLIATIVE CARE BEFORE AND DURING THE COVID-19 PANDEMIC</b> | <b>10.</b> | <b>Do you have experience with delivering palliative care before the COVID-19 pandemic?</b>                                        | Yes<br>No                                                                                                                                                                                                                                                                                                                                                                                                                         |
|                                                                                  | <b>11.</b> | <b>My practice of end-of-life care changed during the COVID-19 pandemic.</b>                                                       | a) I strongly agree<br>b) I somewhat agree<br>c) I do not know<br>d) I somewhat disagree<br>e) I strongly disagree                                                                                                                                                                                                                                                                                                                |
|                                                                                  | <b>12.</b> | <b>If you answered that you have changed your practice, which factors could have led to this difference? (tick all that apply)</b> | a) Staff factors (staff qualification, exhaustion or overload,...)<br>b) Administrative factors (organisation and management in the ICU)<br>c) Equipment limitation (drug therapy, medical devices, medical supplies)<br>d) Different clinical characteristics and prognosis of patients with COVID-19 disease<br>e) Overwhelmed healthcare<br>f) Difficult communication (in health team, with hospital / department management) |

|                                                                                                                                      |                                                      |       |
|--------------------------------------------------------------------------------------------------------------------------------------|------------------------------------------------------|-------|
| Protocol identifier: PC-19-EU<br>ClinicalTrials.gov: <a href="https://clinicaltrials.gov/ct2/show/study/NCT05089032">NCT05089032</a> | Synopsis version last update:<br>1.3 16th March 2023 | FINAL |
|--------------------------------------------------------------------------------------------------------------------------------------|------------------------------------------------------|-------|

|                                                                         |     |                                                                                                                                                                                                                                         |                                                                                                                                                                                                                                                                                                 |
|-------------------------------------------------------------------------|-----|-----------------------------------------------------------------------------------------------------------------------------------------------------------------------------------------------------------------------------------------|-------------------------------------------------------------------------------------------------------------------------------------------------------------------------------------------------------------------------------------------------------------------------------------------------|
|                                                                         |     |                                                                                                                                                                                                                                         | g) Process of End-of-Life-Decision making (family participation, healthcare team members participation)<br>h) Different ethical principles (tendency to rescue as much as possible people)<br>i) Impact of emotions in the decision making (emotional burden)<br>j) Other .... (please specify) |
|                                                                         | 13. | <b>During the care of COVID-19 patients in your ICU, have you ever found yourself in a situation known as resource scarcity?</b><br><i>(Resource scarcity is a situation characterised by lack of time, medication or equipment...)</i> | Yes, frequently<br>Yes, occasionally<br>No                                                                                                                                                                                                                                                      |
|                                                                         | 14. | <b>Have you ever felt that limitations of resources (e.g., skilled staff, ventilators, beds) were used as an argument in end-of-life decision making?</b>                                                                               | Yes/No                                                                                                                                                                                                                                                                                          |
|                                                                         | 15. | <b>If so, what was your perspective?</b>                                                                                                                                                                                                | a) I was not comfortable incorporating resource scarcity into the decision-making process.<br>b) I understand the need to incorporate resource scarcity into the decision-making process.<br>c) Other .... (please specify)                                                                     |
| III. DESCRIPTION OF<br>PALLIATIVE AND EOL<br>CARE AFTER THE<br>PANDEMIC | 16. | <b>Do you have a local protocol for End-of-Life-Decision making (EOLD)?</b>                                                                                                                                                             | Yes<br>No                                                                                                                                                                                                                                                                                       |
|                                                                         | 17. | <b>Do you have a dedicated palliative care team in your hospital?</b>                                                                                                                                                                   | Yes<br>No                                                                                                                                                                                                                                                                                       |
|                                                                         | 18. | <b>Please indicate who is usually involved in the end-of-life decision-making (EOLD) (tick all that apply)</b>                                                                                                                          | a) Patient<br>b) Head of department<br>c) Attending physician<br>d) Nurse manager (head of the nurses, matron)<br>e) Attending nurse                                                                                                                                                            |

|                                                                                                                                      |                                                      |       |
|--------------------------------------------------------------------------------------------------------------------------------------|------------------------------------------------------|-------|
| Protocol identifier: PC-19-EU<br>ClinicalTrials.gov: <a href="https://clinicaltrials.gov/ct2/show/study/NCT05089032">NCT05089032</a> | Synopsis version last update:<br>1.3 16th March 2023 | FINAL |
|--------------------------------------------------------------------------------------------------------------------------------------|------------------------------------------------------|-------|

|  |            |                                                                                                                                            |                                                                                                                                                                                                                                                                                                                                                                                                                                                                                                                                                                                                                                                                                                   |
|--|------------|--------------------------------------------------------------------------------------------------------------------------------------------|---------------------------------------------------------------------------------------------------------------------------------------------------------------------------------------------------------------------------------------------------------------------------------------------------------------------------------------------------------------------------------------------------------------------------------------------------------------------------------------------------------------------------------------------------------------------------------------------------------------------------------------------------------------------------------------------------|
|  |            |                                                                                                                                            | f) Family (relatives) of patient<br>g) Palliative care physician<br>h) Consultant physician<br>i) Primary (family) physician<br>Other .... (please specify)                                                                                                                                                                                                                                                                                                                                                                                                                                                                                                                                       |
|  | <b>19.</b> | <b>How do you normally conduct EOLD discussions with family?</b>                                                                           | a) Face-to-face in a separate room<br>b) Face-to-face at the bedside<br>c) By telephone<br>d) Video conference<br>e) The family has not been contacted<br>f) Other .... (please specify)                                                                                                                                                                                                                                                                                                                                                                                                                                                                                                          |
|  | <b>20.</b> | <b>What is the usual involvement of family in the decision to transition the patient to a comfort care approach? (tick all that apply)</b> | a) Family fully decides on the EOLD, the responsibility for the final decision is delegated fully to them<br>b) Family is part of the team and participates in decision-making (shared decision making)<br>c) Family is only informed of the EOLD made solely by the medical team; the EOLD is carried out, unless the patient's relatives disagree with the decision<br>d) Family is only informed of the EOLD made solely by the medical team; the EOLD is carried out, even if the patient's relatives disagreement with the decision<br>e) Family is not informed at all about the EOLD<br>f) I cannot comment, I did not participate in these discussions.<br>g) Other .... (please specify) |
|  | <b>21.</b> | <b>Have you experienced a situation where you perceived a patient's care as inappropriate? (tick all that apply)</b>                       | a) Yes, life support was administered for too long<br>b) Yes, life support was too intensive<br>c) Yes, life support was administered for too short<br>d) Yes, life support was not intensive enough                                                                                                                                                                                                                                                                                                                                                                                                                                                                                              |

|                                                                                                                                      |                                                      |       |
|--------------------------------------------------------------------------------------------------------------------------------------|------------------------------------------------------|-------|
| Protocol identifier: PC-19-EU<br>ClinicalTrials.gov: <a href="https://clinicaltrials.gov/ct2/show/study/NCT05089032">NCT05089032</a> | Synopsis version last update:<br>1.3 16th March 2023 | FINAL |
|--------------------------------------------------------------------------------------------------------------------------------------|------------------------------------------------------|-------|

|                                                                  |     |                                                                                                                                                                      |                                                                                                                                 |
|------------------------------------------------------------------|-----|----------------------------------------------------------------------------------------------------------------------------------------------------------------------|---------------------------------------------------------------------------------------------------------------------------------|
|                                                                  |     |                                                                                                                                                                      | e) No, I have not experienced this situation<br>f) Other .... (please specify)                                                  |
|                                                                  | 22. | If you selected a), b), c), or d) in question 21, did you express your opinion about inappropriate care?                                                             | Yes<br>No                                                                                                                       |
|                                                                  | 23. | If you selected YES in question 22, was your opinion respected?                                                                                                      | Yes<br>No                                                                                                                       |
|                                                                  | 24. | Do you agree with the statement: The COVID-19 pandemic has changed the provision of palliative care in your ICU                                                      | Yes<br>No                                                                                                                       |
|                                                                  | 25. | If you selected YES in question 26: which particular area of palliative care has changed? (tick all that apply)                                                      | a) Processes<br>b) Human factors<br>c) Communication<br>d) Ethical principles<br>e) Education<br>f) Other .... (please specify) |
| IV. CHARACTERISTICS OF<br>MORAL DISTRESS AND<br>POSSIBLE FACTORS | 26. | In your opinion, moral distress is a feature after the COVID-19 pandemic?                                                                                            | a) I strongly agree<br>b) I somewhat agree<br>c) I do not know<br>d) I somewhat disagree<br>e) I strongly disagree              |
|                                                                  | 27. | If You answered a) or b) to question 26 - was the level of moral distress you felt after the COVID-19 pandemic comparable to levels experienced before the pandemic? | a) I strongly agree<br>b) I somewhat agree<br>c) I do not know<br>d) I somewhat disagree<br>e) I strongly disagree              |

|                                                                                                                                      |                                                      |       |
|--------------------------------------------------------------------------------------------------------------------------------------|------------------------------------------------------|-------|
| Protocol identifier: PC-19-EU<br>ClinicalTrials.gov: <a href="https://clinicaltrials.gov/ct2/show/study/NCT05089032">NCT05089032</a> | Synopsis version last update:<br>1.3 16th March 2023 | FINAL |
|--------------------------------------------------------------------------------------------------------------------------------------|------------------------------------------------------|-------|

|  |            |                                                                                                                                                                        |                                                                                                                                                                                                                                                                                                                                                                                                                                                                                                                                                                                                                                                                                                                                                                                                                                                                   |
|--|------------|------------------------------------------------------------------------------------------------------------------------------------------------------------------------|-------------------------------------------------------------------------------------------------------------------------------------------------------------------------------------------------------------------------------------------------------------------------------------------------------------------------------------------------------------------------------------------------------------------------------------------------------------------------------------------------------------------------------------------------------------------------------------------------------------------------------------------------------------------------------------------------------------------------------------------------------------------------------------------------------------------------------------------------------------------|
|  | <b>28.</b> | <b>If you experienced moral distress after the COVID-19 pandemic, what were the possible sources of this distress? (tick all that apply)</b>                           | <ul style="list-style-type: none"> <li>a) Organisational / institutional (e.g. you did a job for which you have no training, insufficient information...)</li> <li>b) Interpersonal relationships (1. gender perception/ 2. collective mood/ 3. public attitude towards health workers during the COVID-19 pandemic)</li> <li>c) Difficulty of the work (1. physical strain/ 2. psychological strain/ 3. risk of infection of the worker)</li> <li>d) The need to make decisions in a situation of resource scarcity - care prioritisation</li> <li>e) Changes in standards of care (positioning the patient at different intervals, more difficult communication with the patient's relatives, ...)</li> <li>f) Administration of experimental drugs or non-indicated drugs outside studies (clinical trials)</li> <li>g) Other .... (please specify)</li> </ul> |
|  | <b>29.</b> | <b>Do you agree that currently patients die with dignity in your ICU?</b>                                                                                              | <ul style="list-style-type: none"> <li>a) I strongly agree</li> <li>b) I somewhat agree</li> <li>c) I do not know</li> <li>d) I somewhat disagree</li> <li>e) I strongly disagree</li> </ul>                                                                                                                                                                                                                                                                                                                                                                                                                                                                                                                                                                                                                                                                      |
|  | <b>30.</b> | <b>If you did not answer a) to question 29, please define those factors that contribute to the lack of dignity at the end of life? - more than one answer possible</b> | <ul style="list-style-type: none"> <li>a) Inadequate control of the patient's symptoms (e.g. pain, dyspnoea)</li> <li>b) Inadequate communication within the team</li> <li>c) Organizational issues (e.g. isolation and therefore entering the patient's room possible only at certain intervals)</li> </ul>                                                                                                                                                                                                                                                                                                                                                                                                                                                                                                                                                      |

|                                                                                                                                      |                                                      |       |
|--------------------------------------------------------------------------------------------------------------------------------------|------------------------------------------------------|-------|
| Protocol identifier: PC-19-EU<br>ClinicalTrials.gov: <a href="https://clinicaltrials.gov/ct2/show/study/NCT05089032">NCT05089032</a> | Synopsis version last update:<br>1.3 16th March 2023 | FINAL |
|--------------------------------------------------------------------------------------------------------------------------------------|------------------------------------------------------|-------|

|  |            |                                                                                                                     |                                                                                                                                                                                                                                                                      |
|--|------------|---------------------------------------------------------------------------------------------------------------------|----------------------------------------------------------------------------------------------------------------------------------------------------------------------------------------------------------------------------------------------------------------------|
|  |            |                                                                                                                     | d) Lack of understanding of the principles of comfort care<br>e) Resource scarcity (e.g. sedatives, analgesics...)<br>f) Inconsistency of physicians' views on palliative care<br>g) Inconsistency of nurses' views on comfort care<br>h) Other.... (please specify) |
|  | <b>31.</b> | <b>Are the goals of treatment in EOL always clearly set and explained to the team?</b>                              | a) I strongly agree<br>b) I somewhat agree<br>c) I do not know<br>d) I somewhat disagree<br>e) I strongly disagree                                                                                                                                                   |
|  | <b>32.</b> | <b>Do you know where to ask for help if you, or a team member, are experiencing distress or emotional overload?</b> | a) I strongly agree<br>b) I somewhat agree<br>c) I do not know<br>d) I somewhat disagree<br>e) I strongly disagree                                                                                                                                                   |
|  | <b>33.</b> | <b>Please use this space to write any experience or comment you would like to share with us</b>                     | Free answers.                                                                                                                                                                                                                                                        |
